# Supplementary material for: Complement C3a activates osteoclasts by regulating the PI3K/PDK1/SGK3 pathway in patients with multiple myeloma
Source: PubMed Central journal article supplement (PMC8330530; doi:10.20892/j.issn.2095-3941.2020.0430), 2021-08-15
Supplement: cbm-18-721-s001.pdf [file cbm-18-721-s001.pdf]

## Supplementary materials

**Table S1** Primer sequences

| Target genes | Sense and anti-sense sequences                                                               |
|--------------|----------------------------------------------------------------------------------------------|
| OSCAR        | F: 5'-GTT ACC GCT GCT GCT ACC GAA G-3'<br>R: 5'-GCG CAG GCT CAC GTT GGC-3'                   |
| RANKL        | F: 5'-ATA TCG TTG GAT CAC AGC ACA TCA GAG-3'<br>R: 5'-TGT CGG TGG CAT TAA TAG TGA GAT GAG-3' |
| Cathepsin K  | F: 5'-CCA TCC ATA ACC TTG AGG CTT CTC TTG-3'<br>R: 5'-CCA GTC ATC TTC TGA ACC ACC TCT TC-3'  |
| TRAP         | F: 5'-ATG ACC ACC TTG GCA ATG TCT CTG-3'<br>R: 5'-AGG CTG CTG GCT GAG GAA GTC-3'             |
| SGK3         | F: 5'-GGA CAG TCC AAA ACA CCA GTC A-3'<br>R: 5'-TTT CCA GAC GGT CCC AGG TT-3'                |
| PIK3CA       | F: 5'- GAG ATT GCA AGC AGT GAT AGT G-3'<br>R: 5'- TAA TTT TGG CAG TGA TTG TGG G-3'           |
| POSTN        | F: 5'- CAC CAA TGA GGC TTT TGA GAA A-3'<br>R: 5'- GAC TGC TCC TCC CAT AAT AGA C-3'           |
| COL1A1       | F: 5'- AAA GAT GGA CTC AAC GGT CTC-3'<br>R: 5'- CAT CGT GAG CCT TCT CTT GAG-3'               |
| COL1A2       | F: 5'- CTC CAT GGT GAG TTT GGT CTC-3'<br>R: 5'- CTT CCA ATA GGA CCA GTA GGA C-3'             |
| CREB1        | F: 5'- CTG ATG GAC AGC AGA TCT TAG T-3'<br>R: 5'- CTT CAT TAG ACG GAC CTC TCT C-3'           |
| MDM2         | F: 5'- CTT CTA GGA GAT TTG TTT GGC G-3'<br>R: 5'- ATG TAC CTG AGT CCG ATG ATT C-3'           |
| IKBK         | F: 5'- GTG GAG CAC CTG AAG AGA TG-3'<br>R: 5'- CAG AGC CTG GCA TTC CTT AG-3'                 |
| NTRK2        | F: 5'- CCG CAA CAA GCA CCG AGG AG -3'<br>R: 5'- CCA CAA CCA GCC AGC AGA AGC -3'              |
| CDK2         | F: 5'- CCT GGG CTG CAA ATA TTA TTC C-3'<br>R: 5'- TGG CTT GTA ATC AGG CAT AGA A-3'           |
| TCL1A        | F: 5'- GTT CGT GTA TTT GGA CGA GAA G-3'<br>R: 5'- CAG AAA CTG GAG TCT GAG GAT C-3'           |
| AKT3         | F: 5'- CAG ACA GAC TGC AGA GGC AA -3'<br>R: 5'- CCA CTT GCC TTC TCT CGA ACC -3'              |
| PDK1         | F: 5'-ACG CAC AAT ACT TCC AAG GAG ACC-3'<br>R: 5'-ATC AGC CTC GTG GTTG GTG TTG-3'            |
| GAPDH        | F: 5'-CAG GAG GCA TTG CTG ATG AT-3'<br>R: 5'-GAA GGC TGG GGC TCA TTT-3'                      |

**Table S2** Extension temperatures of target genes

| Target genes | Extension temperatures |
|--------------|------------------------|
| OSCAR        | 63.5 °C                |
| RANKL        | 57.8 °C                |
| Cathepsin K  | 57.8 °C                |
| TRAP         | 62.3 °C                |
| SGK3         | 55.4 °C                |
| PIK3CA       | 57.3 °C                |
| POSTN        | 57.4 °C                |
| COL1A1       | 58.0 °C                |
| COL1A2       | 57.8 °C                |
| CREB1        | 56.0 °C                |
| MDM2         | 57.1 °C                |
| IKBK         | 57.7 °C                |
| NTRK2        | 64.1 °C                |
| CDK2         | 57.0 °C                |
| TCL1A        | 57.4 °C                |
| AKT3         | 60.0 °C                |
| PDK1         | 60.9 °C                |
